# Supplementary material for: West Nile virus infection and interferon alpha treatment alter the spectrum and the levels of coding and noncoding host RNAs secreted in extracellular vesicles
Source: Springer Nature journal article supplement (doi:10.1186/s12864-019-5835-6), 2019-06-10
Supplement: MOESM4 [file 12864_2019_5835_MOESM4_ESM.csv]

PCR primers used in the study
Gene name	Forward	Reverse	RT (miRNA only)
hsa-miR-27a-5p	GGTGGTG AGGGCTTAGCTGCTTG	CCA GTG CAG GGT CCG AGG TA	GTCGTATCCAGTGCAGGGTCCGAGGTATTCGCACTGGATACGACTGCTCA
hsa-miR-3614-5p	GCA CGA GCC ACT TGG ATC TGA AGG	CCA GTG CAG GGT CCG AGG TA	GTCGTATCCAGTGCAGGGTCCGAGGTATTCGCACTGGATACGACGGGCAG
hsa-miR-664a-5p	GGT GGT GAC TGG CTA GGG AAA ATG A	CCA GTG CAG GGT CCG AGG TA	GTCGTATCCAGTGCAGGGTCCGAGGTATTCGCACTGGATACGACATCCAA
U3 (SNORD3)	AACCACGAGGAAGAGAGGTA	CGGAGAGAAGAACGATCATCAA
U97 (SNORD97)	AGAGGACTTTATGCTGGAGTTC	TCTCATAATCTTCGCTCACAGG
ACA31 (SNORA31)	CTGCATCCACTGATAGACCTTG	CGCCACAAAGACAGACAGAA
snR38B (SNORD1B)_	GCTGAGTCCATGATGATTTCAAG�	CAGATATTCAAATTCCACACAGAAAGG
IFNL2	ACC TCC AAC CTC TTC CGC CTC	TAG CGA CTG GGT GGC AAT AAA
IFNB1	TGC TCT CCT GTT GTG CTT CTC	ATG TCA AAG TTC ATC CTG TCC TTG
ISG15	CAG CGA ACT CAT CTT TGC CAG T	CAT CTT CAC CGT CAG GTC CCA
OAS1	ACA GGA AAC TTG GGT GGT GGA	AAT GGC AGG GAG GAA GCA GG
TRIM25	CTG GGT CGT GGA GTG GTT CA	TTG GTG GAG GGC AGG GTT TT
MDA5	TTC CGC TAT CTC ATC TCG TGC TT	AGG TGC CAG ACT CCC TTC TCC
IFIH1	GAAGTACAATGAGGCCCTACAA	CATCACCACCCTCATCACTATC
DDX58 (RIG-I)	CGTGTGCCATTGTTCTCTTTG	GTCAGACTGCCTCATCTGTAAC
WNV	TTG AGT GTG ATG ACC ATG GGA G	TAG CTG GTT GTC TGT CTG CG
TBP	GCT GGC CCA TAG TGA TCT TT	CTT CAC ACG CCA AGA AAC AGT
